# Supplementary material for: Fine-mapping from summary data with the “Sum of Single Effects” model
Source: PubMed Central journal article supplement (PMC9337707; doi:10.1371/journal.pgen.1010299), 2022-07-19

zero effect, flipped allele

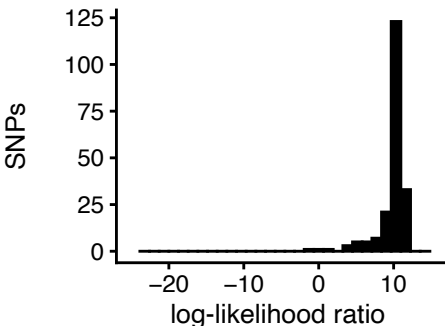

nonzero effect, flipped allele

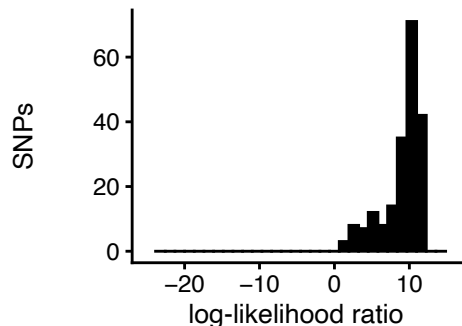

zero effect, no flipped allele

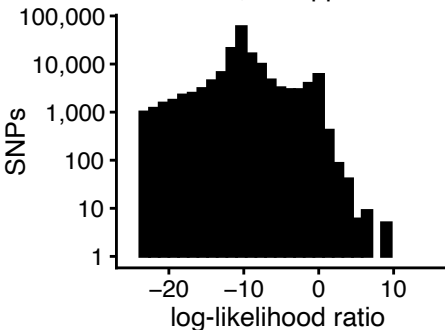

nonzero effect, no flipped allele

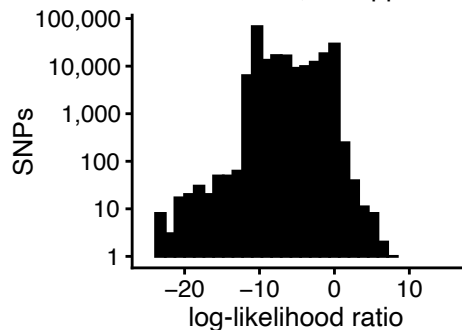zero effect, no flipped allele,  
lz-score > 2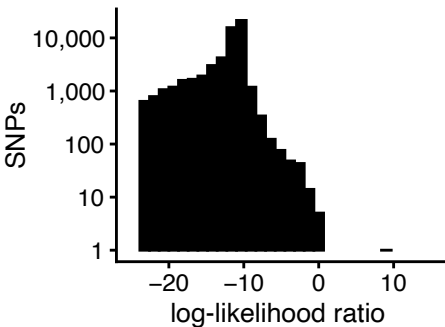nonzero effect, no flipped allele,  
lz-score > 2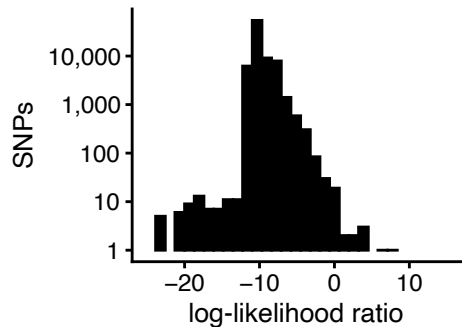

Supplement: pgen.1010299.s001.pdf [file pgen.1010299.s001.pdf]
